# Supplementary material for: An investigation of the structure and properties of layered copper thiolates
Source: Royal Society of Chemistry journal article supplement (doi:10.1039/b009837j), 2001-01-01
Supplement: b009837j.doc [file b009837j.doc]

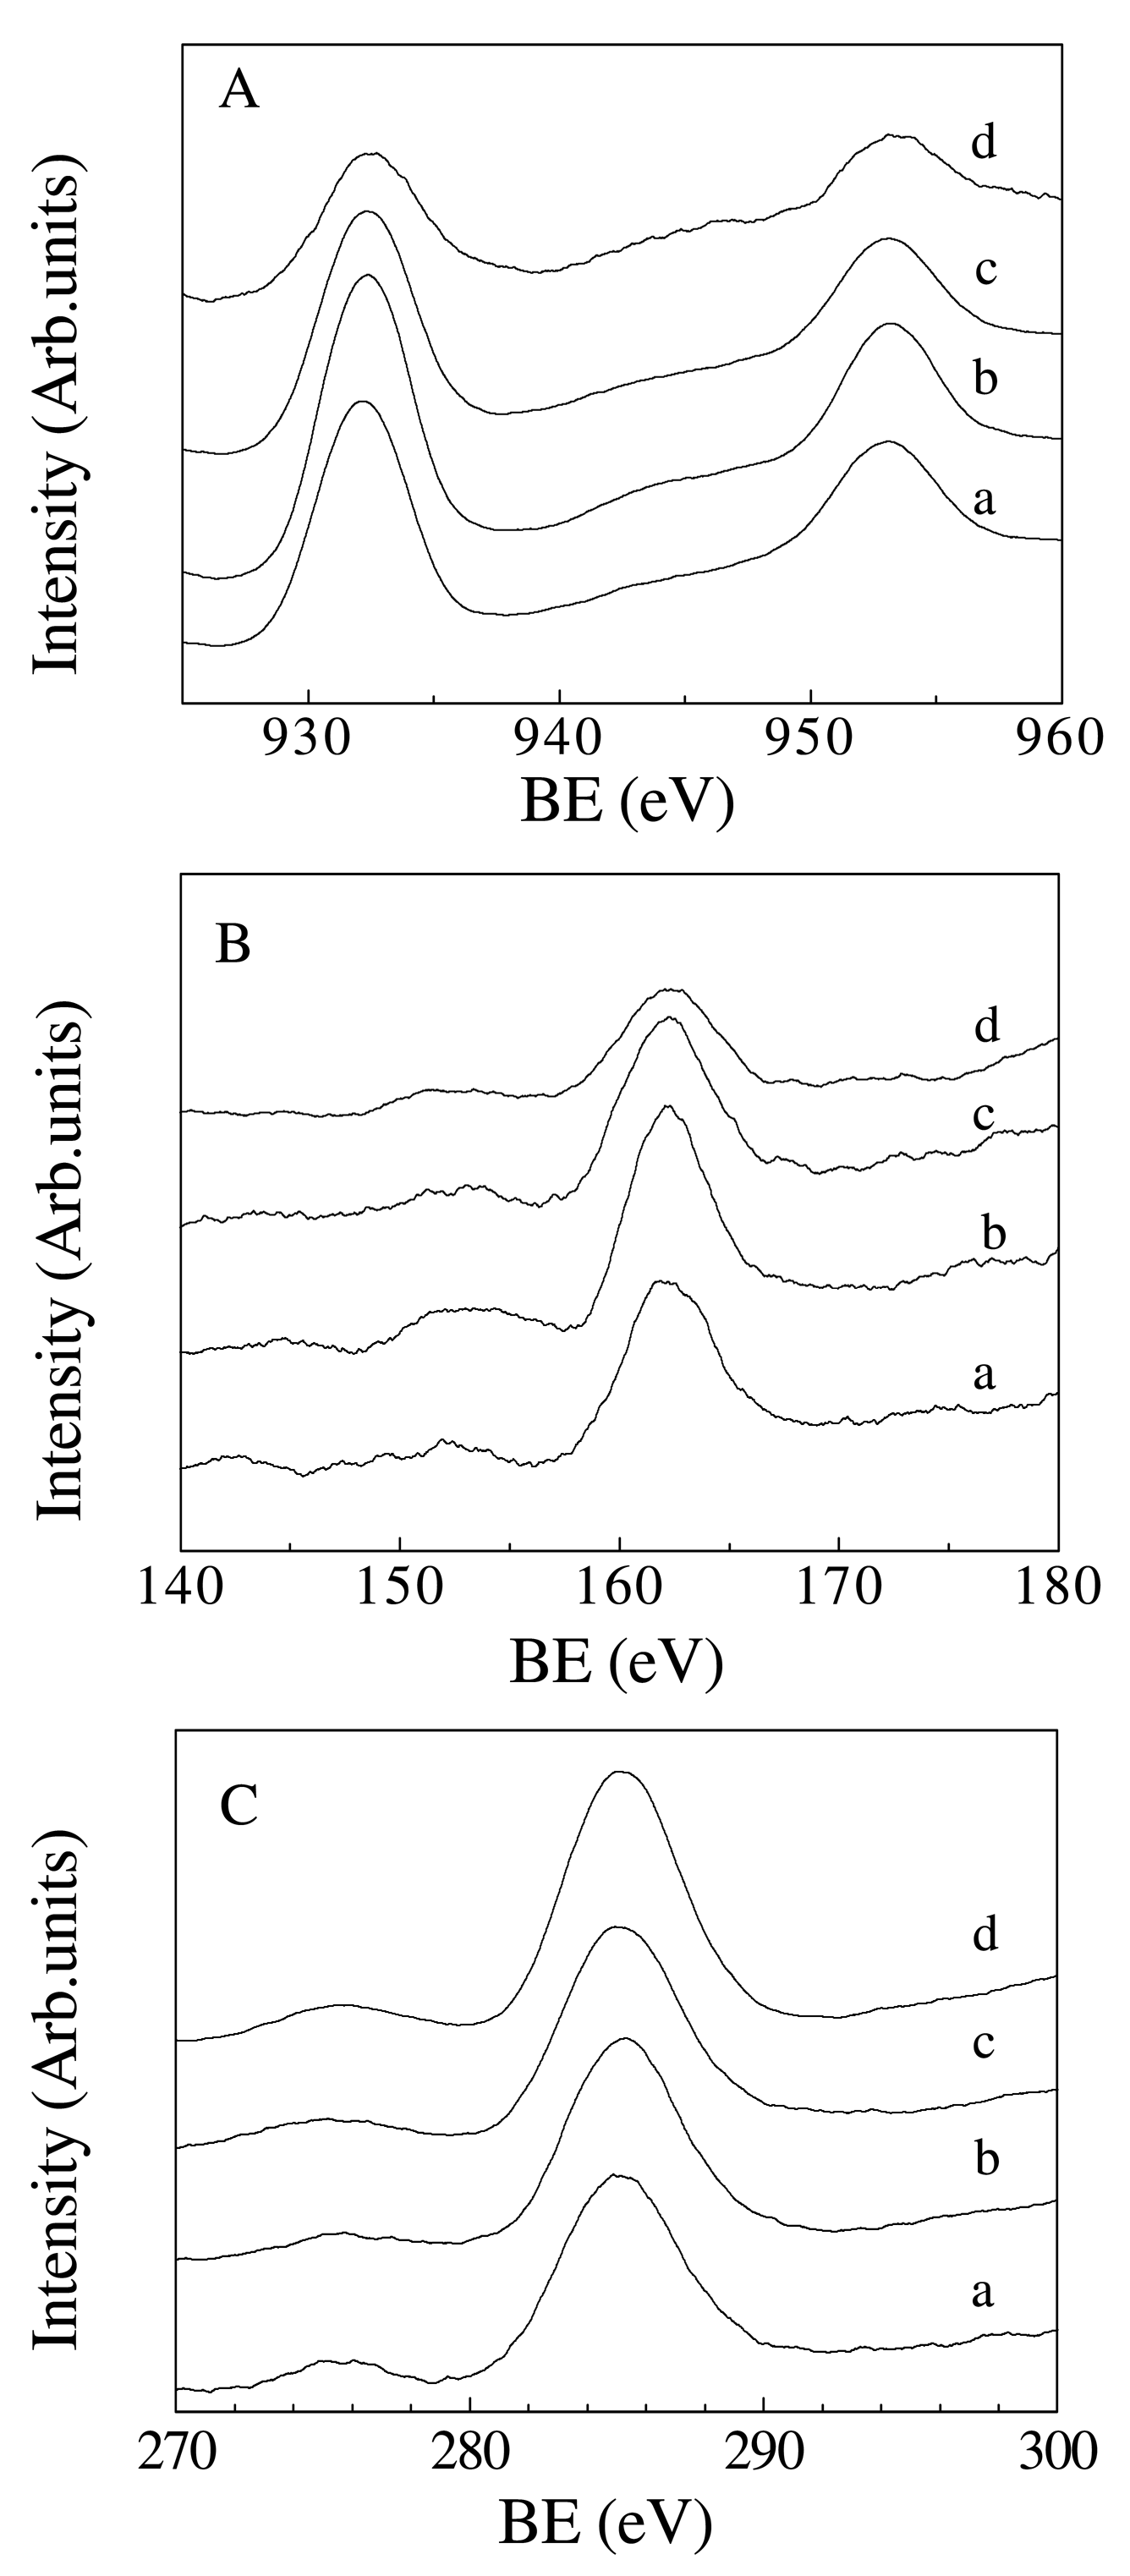
**Electronic Supplementary Information**

Supplementary 1. X-ray photoelectron spectra of (A) Cu2p region, (B) S2p region and (C) C1s region of the thiolates. (a), (b), (c) and (d) corresponds to CuBT, CuPT, CuOT and CuODT respectively.


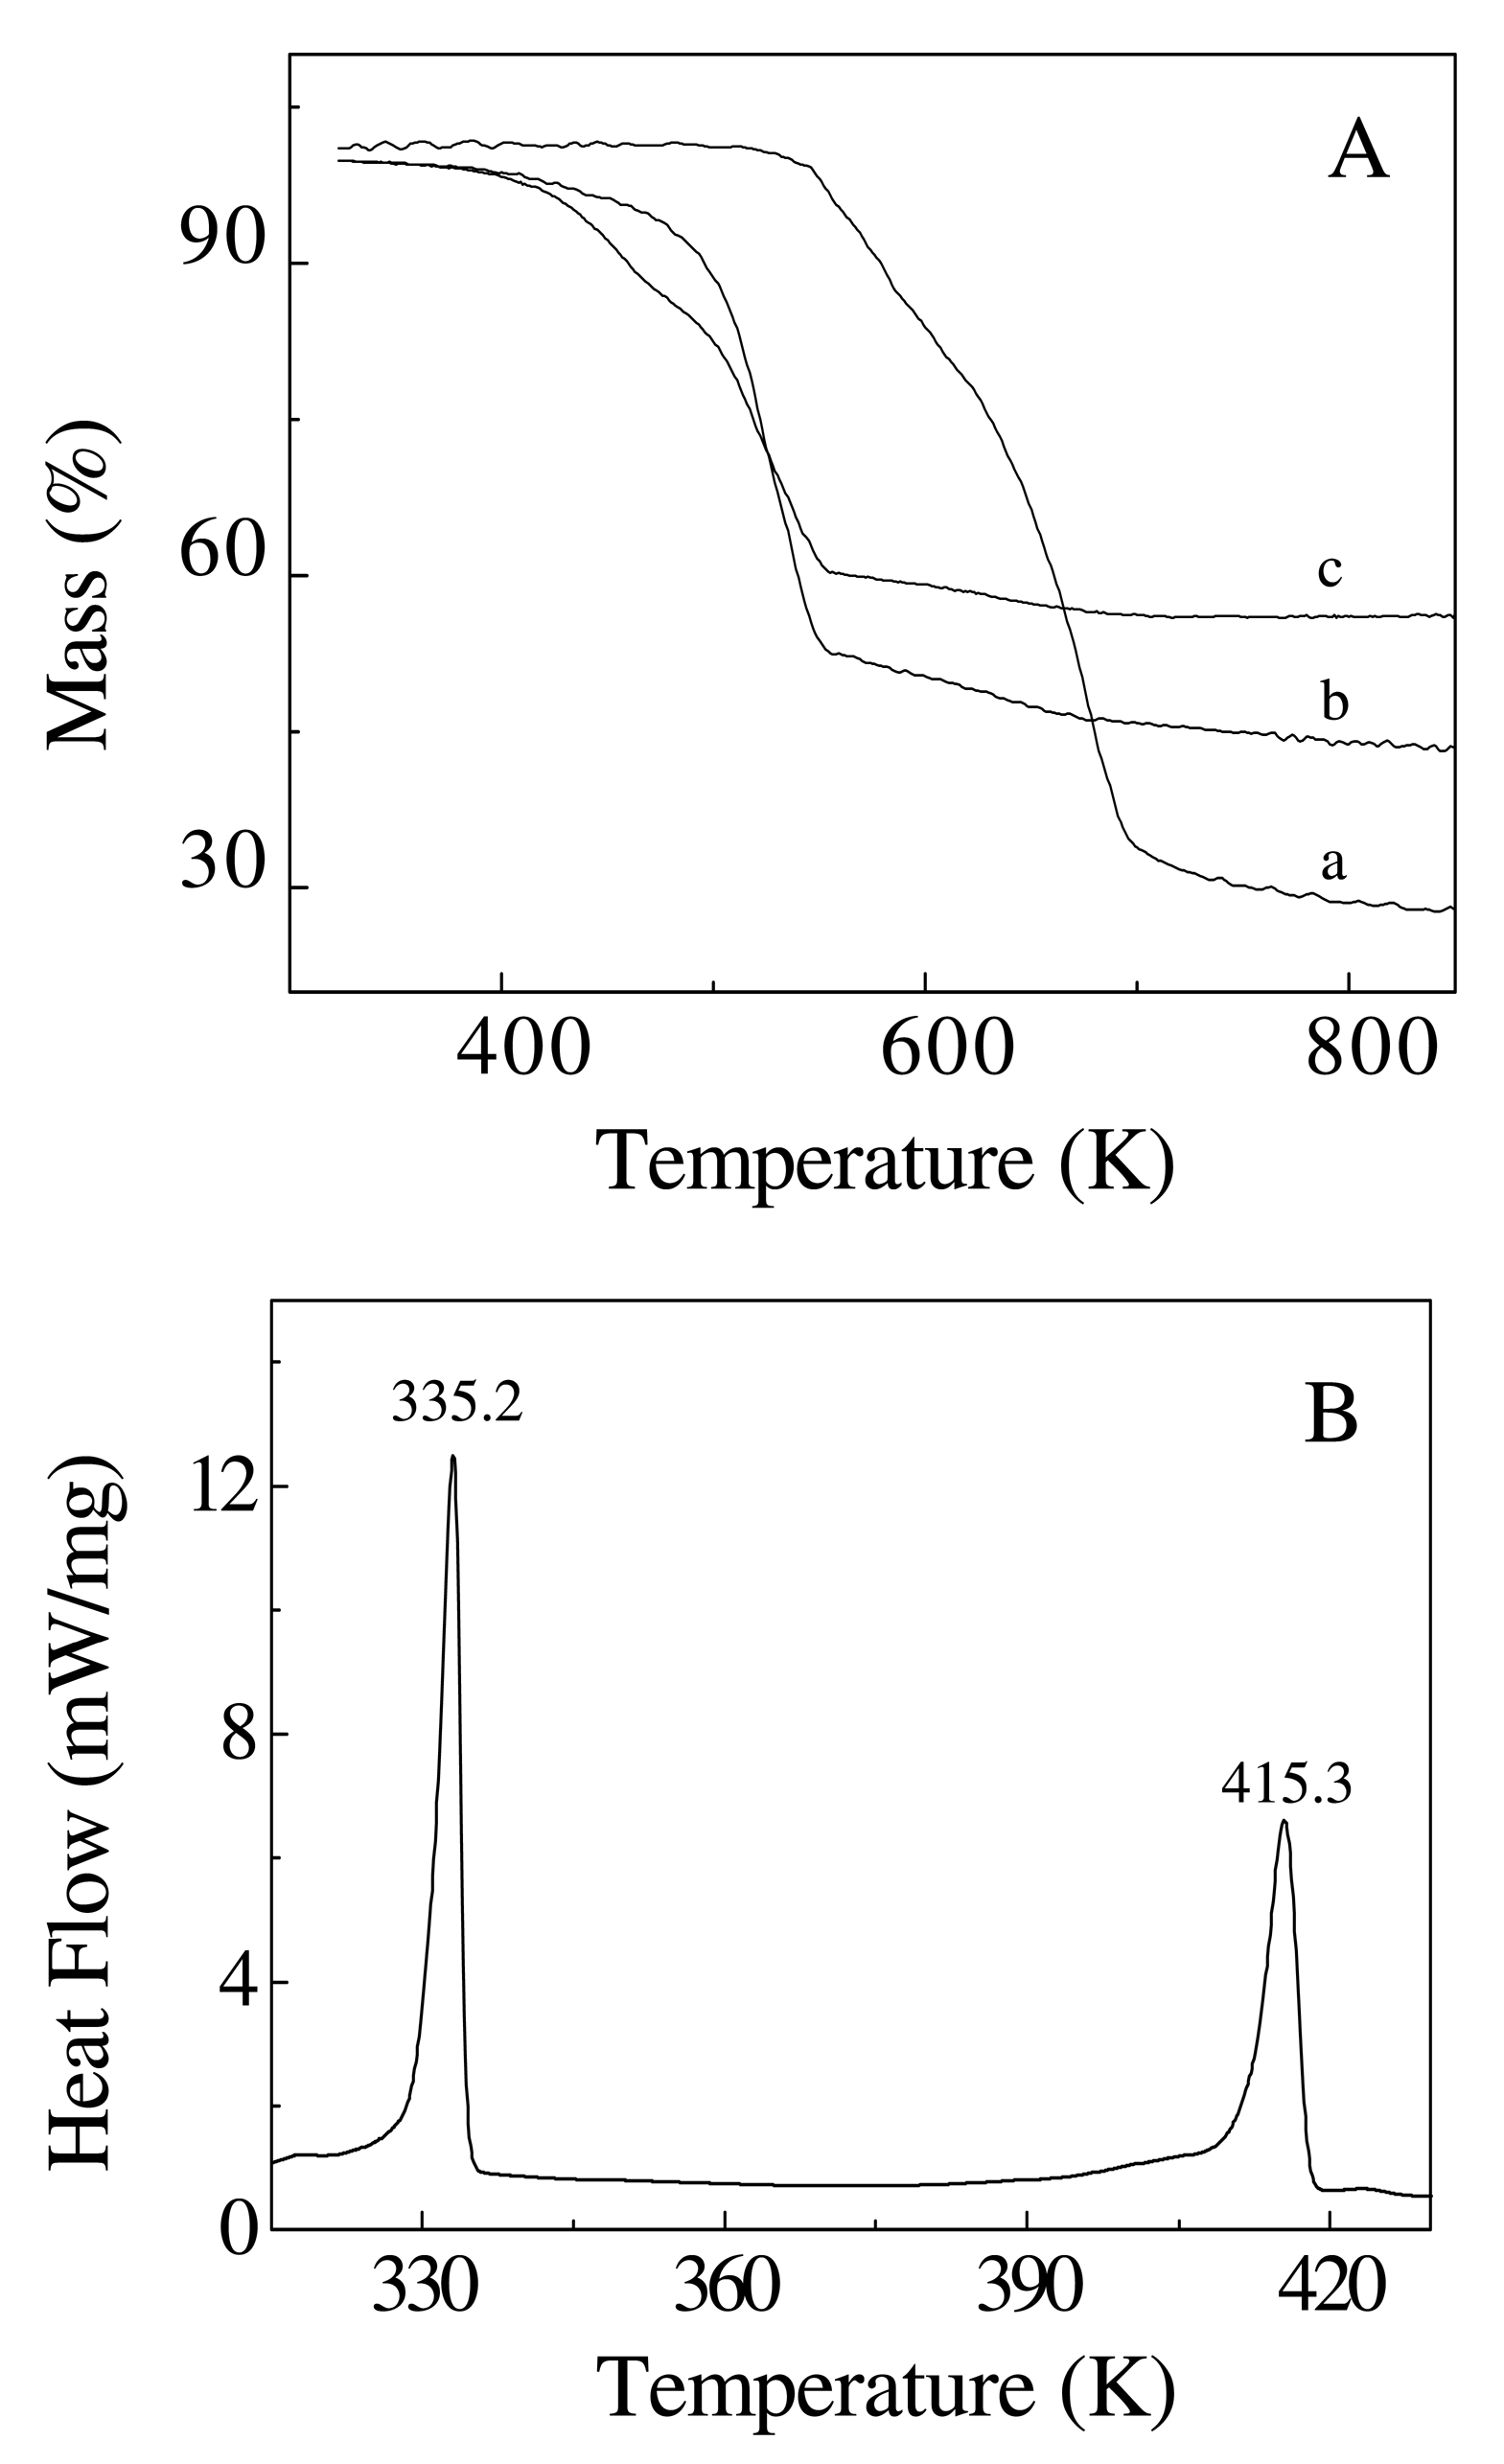


Supplementary 2. (A)Thermogravimetric traces of (a) CuODT, (b) CuOT and (c) CuPT. The mass losses are corresponding to a 1:1 ratio of copper and thiolate. (B) DSC traces of CuODT (data upon heating to 473 K). The transition temperatures are marked.
